# Supplementary material for: C/EBP-Induced Transdifferentiation Reveals Granulocyte-Macrophage Precursor-like Plasticity of B Cells
Source: PubMed Central journal article supplement — Stem Cell Reports. 2017 Jan 19;8(2):346–59. doi: 10.1016/j.stemcr.2016.12.015 (PMC5312250; doi:10.1016/j.stemcr.2016.12.015), 2017-01-19
Supplement: mmc1.pdf [file mmc1.pdf]

**Stem Cell Reports, Volume 8**

**Supplemental Information**

**C/EBP-Induced Transdifferentiation Reveals Granulocyte-Macrophage  
Precursor-like Plasticity of B Cells**

**Branko Cirovic, Jörg Schönheit, Elisabeth Kowenz-Leutz, Jelena Ivanovska, Christine Klement, Nina Pronina, Valérie Bégay, and Achim Leutz**

Supplemental Figures

Figure S1

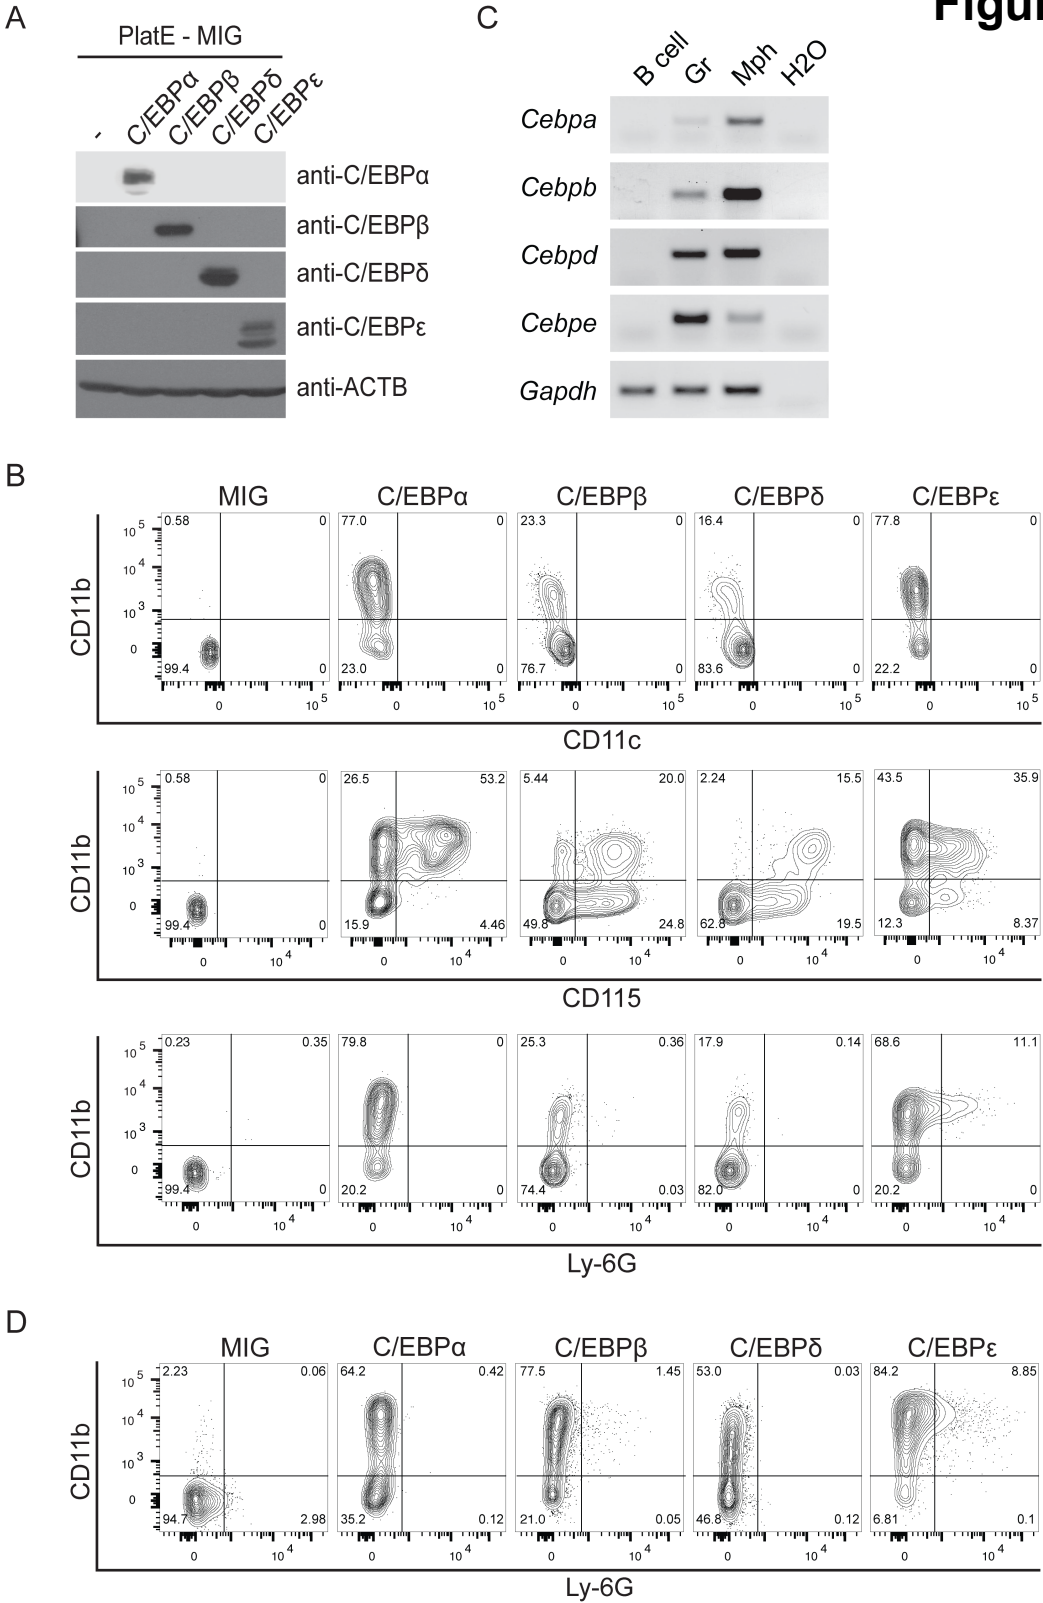

**Figure S2**

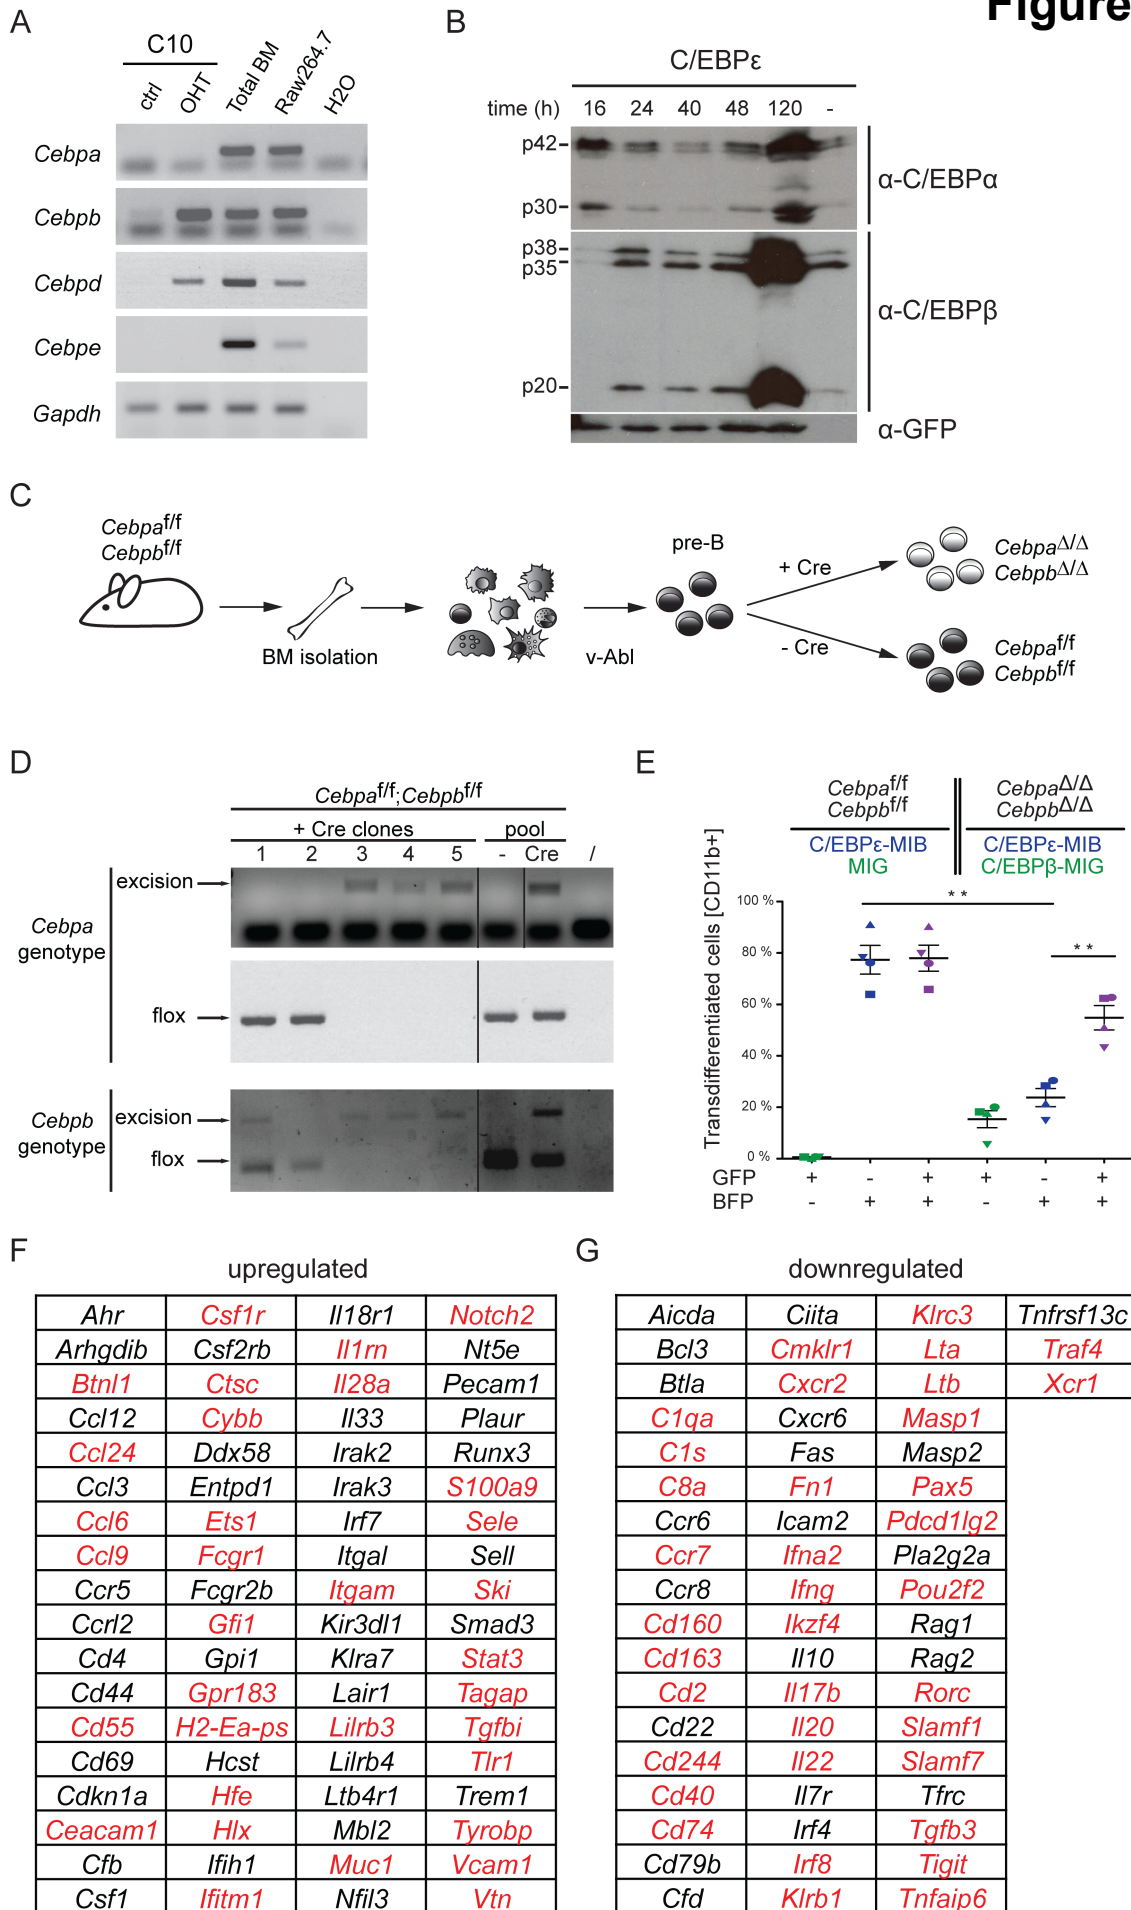

# Figure S3

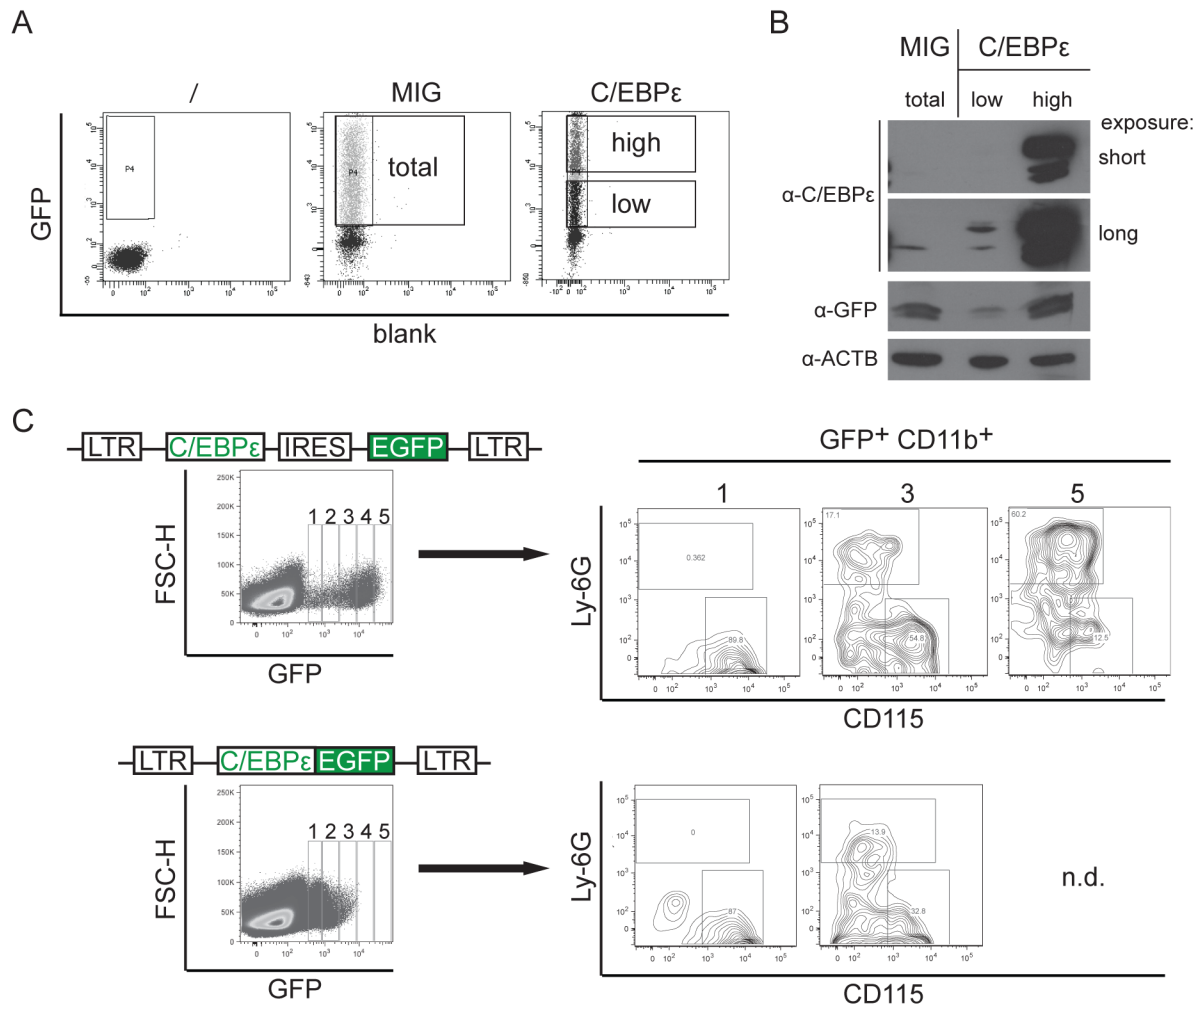

**Figure S4**

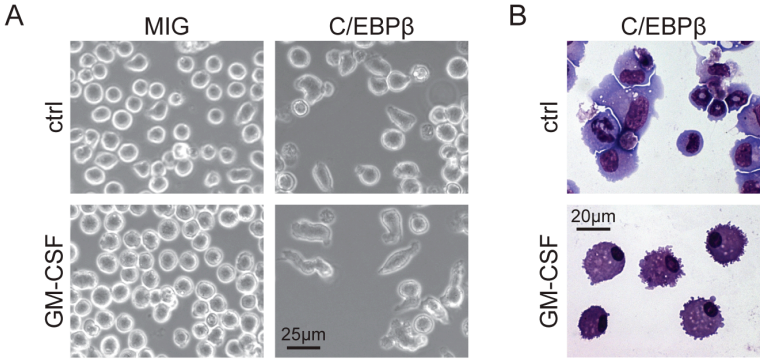

Figure S5

A

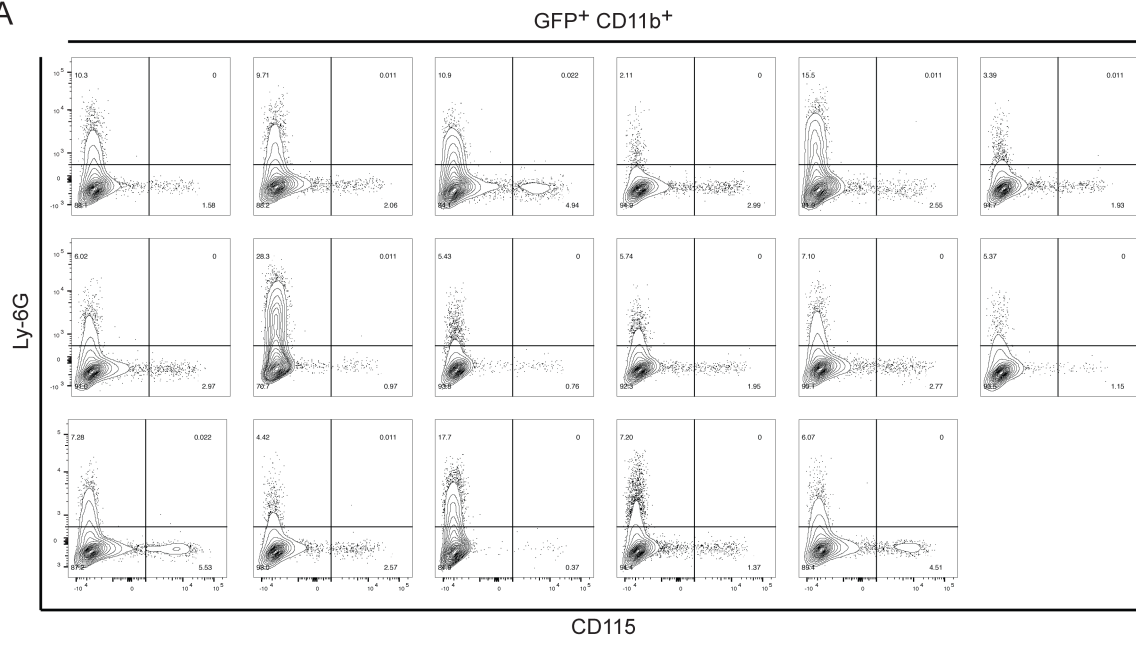

**Figure S1: Lympho-myeloid conversion potential of C/EBP family members,**

Related to Figure 1

(A) Immunoblot analysis of C/EBP family members of total protein lysates from Plat-E cells 72 h after transduction with C/EBP-MIG constructs. Untransduced cells served as control and ACTB as housekeeping gene. (B) Flow cytometric analysis of B cells transduced with individual C/EBPs focusing on macrophage (CD11b<sup>+</sup>CD115<sup>+</sup>), dendritic (CD11b<sup>+</sup>CD11c<sup>+</sup>) and granulocytic (CD11b<sup>+</sup>Ly-6G<sup>+</sup>) markers 4 days after transduction. (C) Semi-quantitative RT-PCR analysis of C/EBP expression in murine primary FACS-purified B cells (CD19<sup>+</sup>), granulocytes (CD11b<sup>+</sup>Ly-6G<sup>+</sup>) and macrophages (CD11b<sup>+</sup>CD115<sup>+</sup>). *Gapdh* served as housekeeping gene. (D) Flow cytometric analysis of C/EBP-transduced GFP<sup>+</sup>-gated HAFTL1 cells 4 days after induction.

**Figure S2: The role of endogenous *Cebpa* and *Cebpb* on transdifferentiation,**

Related to Figure 3

(A) Semi-quantitative RT-PCR expression analysis of endogenous C/EBP family members in C10 cells treated with OHT for 4 days and non-induced controls (Bussmann et al. 2009). RNA from total bone marrow or monocytic Raw264.7 cells served as controls. *Gapdh* was used as housekeeping gene. (B) Expression kinetics of endogenous C/EBP $\alpha$ , and  $\beta$  protein in C/EBP $\epsilon$ -transduced B cells based on immunoblot analysis. (C) Workflow for the generation of *Cebpa* and *Cebpb* double knockout v-Abl immortalized B cells and isogenic controls derived from a mouse with homozygous floxed *Cebpa* and *Cebpb* alleles. Deletion of *Cebpa* and *Cebpb* by incubating cells with recombinant Cre-recombinase. (D) *Cebpa* and *Cebpb* genotypes of established Cre-incubated cell clones was assessed by PCR. Pools of Cre-treated and untreated cells served as controls. Clone 4 was selected for further experiments.

(E) Quantification of transdifferentiated cells (CD11b<sup>+</sup>, related to Figure 3C) from four independent experiments.  $\pm$ SEM, \*\* $p < 0.01$ . (F) Nanostring analysis showing upregulated genes 24 h after C/EBP $\epsilon$  transduction in GFP<sup>+</sup>-sorted cells compared to control B cells (MIG-transduced). Genes that were not upregulated in *Cebpa* $\Delta\Delta$ ;*Cebpb* $\Delta\Delta$  cells are marked in red. (G) Downregulated genes in GFP<sup>+</sup> FACS-purified control cells transduced for one day with C/EBP $\epsilon$  compared to empty vector. Genes refractory to down-regulation in *Cebpa* $\Delta\Delta$ ;*Cebpb* $\Delta\Delta$  cells are marked in red. See also Table S1.

**Figure S3: Effect of C/EBP $\epsilon$  dosage on transdifferentiated cell type outcome,**  
Related to Figure 4

(A) Sorting scheme of GFP<sup>+</sup> Plat-E cells transduced with empty vector control (MIG) or C/EBP $\epsilon$ -MIG for 72 h. (B) Immunoblot detection of C/EBP $\epsilon$ , GFP and ACTB in protein lysates of  $1 \times 10^6$  FACS-purified cells from GFP-fractions in (A). Two exposure times (short and long) are shown. (C) B cells were transduced with pMSCV-based vectors either containing bi-cistronic C/EBP $\epsilon$ -IRES-EGFP (top panels) or C/EBP $\epsilon$ -EGFP fusion (bottom panels) transgenes. Transduced cells were classified according to GFP intensity and analysed for CD11b<sup>+</sup>Ly-6G<sup>+</sup> and CD11b<sup>+</sup>CD115<sup>+</sup> fractions.

**Figure S4: Myeloid signalling-response of transdifferentiated bi-potential cells,**  
Related to Figure 5

(A) Bright field images of long-term C/EBP $\beta$ -transduced cells, untreated or treated with 10 ng/ml GM-CSF for 24 h. Empty vector (MIG) transduced B cells served as control. (B) Subsequent cytopsin preparations and May-Grünwald-staining after 16 days of culture.



**Figure S5: Persistence of the GMP-like phenotype after serial subcloning,**

Related to Figure 5

Analysis of 17 subclones derived from a GMP-like parental clone presented in Figure 5G,H. Flow cytometric analysis of CD115 versus Ly-6G in the GFP+CD11b+-gated population indicates persistence of the GMP-like potential.

**Supplemental Tables**

**Table S1: Gene expression signature in C/EBP-transduced B cells,**

Related to Figure 2, 3

Nanostring analysis (gene set GXA-MIM) of GFP<sup>+</sup> B cells (*Cebpa*<sup>ff</sup>;*Cebpb*<sup>ff</sup>) transduced with individual C/EBPs for 24 h. C/EBP $\epsilon$ -infected *Cebpa* <sup>$\Delta/\Delta$</sup> ;*Cebpb* <sup>$\Delta/\Delta$</sup>  B cells (B-DKO) were included for comparison. MIG-transduced cells served as control. Normalized gene expression values are shown.

**Table S2: List of primer sequences,**

Related to Experimental Procedures, Figure 4, Figure S1, S2

| <b>Oligonucleotide</b>  | <b>Sequence 5'-3'</b>           |
|-------------------------|---------------------------------|
| Cebpa FW                | GCCAGTTGGGGCACTGGGTG            |
| Cebpa RV                | CCGCGGCTCCACCTCGTAGA            |
| Cebpb FW                | GCGTTCATGCACCGCCTGCT            |
| Cebpb RV                | TAGGCCAGGCAGTCGGGCTC            |
| Cebpd FW                | AGAACCCGCGGCCTTCTAC             |
| Cebpd RV                | ATGTAGGCGCTGAAGTCGAT            |
| Cebpe FW                | CACACTGCGGGCAGACAG              |
| Cebpe RV                | GTGCCTTGAGAAGGGGACT             |
| Gapdh FW                | AATGTGTCCGTCGTGGATCTGA          |
| Gapdh RV                | GATGCCTGCTTCACCACCTTCT          |
| Cebpa flox FW           | TGGCCTGGAGACGCAATGA             |
| Cebpa flox RV           | CGCAGAGATTGTGCGTCTTT            |
| Cebpa $\Delta$ FW       | GCCTGGTAAGCCTAGCAATCCT          |
| Cebpa $\Delta$ RV       | TGGAAACTTGGGTTGGGTGT            |
| Cebpb flox/ $\Delta$ FW | GAGCCACCGCGTCCTCCAGC            |
| Cebpb flox RV           | GGTCGGTGC GCGTCATTGCC           |
| Cebpb $\Delta$ RV       | AGCAGAGCTGCCCCGGCAA             |
| DQ52 FW1                | ACGTCGACTTTTGYAAGGGATCTACTACTGT |
| DFS FW2                 | ACGTCGACGCGGACGACCACAGTGCAACTG  |
| JH4A RV                 | GGGTCTAGACTCTCAGCCGGCTCCCTCAGGG |
